# Supplementary material for: Revealing the peculiar local behavior of manganese and cobalt in diffusion-doped calcium orthovanadate Ca3(VO4)2
Source: Royal Society of Chemistry journal article supplement (doi:10.1039/d1dt03799d), 2022-01-01
Supplement: d1dt03799d1.pdf [file d1dt03799d1.pdf]

**Revealing the peculiar local behavior of manganese and cobalt in diffusion-doped calcium orthovanadate  $\text{Ca}_3(\text{VO}_4)_2$**

Galina M. Kuz'micheva<sup>a</sup>, Liudmila. I. Ivleva<sup>b</sup>, Irina A. Kaurova<sup>a,\*</sup>,  
Evgeny V. Khramov<sup>c</sup>, Vladimir A. Lazarenko<sup>c</sup>, Victor B. Rybakov<sup>d</sup>, Roman D. Svetogorov<sup>c</sup>, and Maxim E. Doroshenko<sup>b</sup>

<sup>a</sup>*MIREA - Russian Technological University, 78 Vernadsky ave., Moscow 119454, Russia*

<sup>b</sup>*Prokhorov General Physics Institute, Russian Academy of Sciences, 38 Vavilova str., Moscow 119991, Russia*

<sup>c</sup>*National Research Center «Kurchatov Institute», 1 Akademika Kurchatova pl., Moscow 123182, Russia*

<sup>d</sup>*Lomonosov State University, 1-3 Vorobyovy Gory, Moscow 119992, Russia*

**Supporting Information**

**Table S1.** Crystallographic data, experimental details and parameters of undoped and diffusion-doped  $\text{Ca}_3(\text{VO}_4)_2\text{Mn}_2\text{O}_3$  and  $\text{Ca}_3(\text{VO}_4)_2\text{Co}_3\text{O}_4$  crystal structure refinement according to the single-crystal X-ray diffraction (D) and single-crystal synchrotron X-ray diffraction (S).

| Method                                                         | D                                                                        |                                                                          |                                                                          | S                                                                        |                                                                          |                                                                          |
|----------------------------------------------------------------|--------------------------------------------------------------------------|--------------------------------------------------------------------------|--------------------------------------------------------------------------|--------------------------------------------------------------------------|--------------------------------------------------------------------------|--------------------------------------------------------------------------|
| Nominal composition                                            | $\text{Ca}_3(\text{VO}_4)_2$ [6]                                         | $\text{Ca}_3(\text{VO}_4)_2\text{Mn}_2\text{O}_3$                        | $\text{Ca}_3(\text{VO}_4)_2\text{Co}_3\text{O}_4$                        | $\text{Ca}_3(\text{VO}_4)_2$                                             | $\text{Ca}_3(\text{VO}_4)_2\text{Mn}_2\text{O}_3$                        | $\text{Ca}_3(\text{VO}_4)_2\text{Co}_3\text{O}_4$                        |
| System, Space group, $Z$                                       | Trigonal, $R3c$ , 21                                                     |                                                                          |                                                                          |                                                                          |                                                                          |                                                                          |
| $a$ , Å                                                        | 10.8059(3)                                                               | 10.7989(3)                                                               | 10.7827(3)                                                               | 10.8117(2)                                                               | 10.6320(2)                                                               | 10.7790(2)                                                               |
| $c$ , Å                                                        | 38.0222(15)                                                              | 37.9041(18)                                                              | 37.9785(12)                                                              | 38.0203(13)                                                              | 37.3860(13)                                                              | 37.9060(13)                                                              |
| $V$ , Å <sup>3</sup>                                           | 3844.90                                                                  | 3828.03                                                                  | 3824.05                                                                  | 3848.88                                                                  | 3659.90                                                                  | 3814.13                                                                  |
| $D_x$ , g/cm <sup>3</sup>                                      | 3.175                                                                    | 3.209                                                                    | 3.321                                                                    | 3.169                                                                    | 3.366                                                                    | 3.321                                                                    |
| Radiation $\lambda$ , Å                                        | MoK $\alpha$ , 0.71073                                                   |                                                                          |                                                                          | 0.79272                                                                  | 0.75312                                                                  | 0.75320                                                                  |
| Absorption $\mu$ , mm <sup>-1</sup>                            | 4.65                                                                     | 4.72                                                                     | 5.21                                                                     | 6.34                                                                     | 6.78                                                                     | 7.13                                                                     |
| $T$ , K                                                        | 295(2)                                                                   |                                                                          |                                                                          | 100(1)                                                                   |                                                                          |                                                                          |
| Sample size, mm                                                | $\sim 0.2 \times 0.2 \times 0.2$                                         |                                                                          |                                                                          | $\sim 0.05 \times 0.05 \times 0.05$                                      |                                                                          |                                                                          |
| Diffraction                                                    | STOE STADI VARI Platus-100 K                                             |                                                                          |                                                                          | “Belok/XSA” beamline (NRC “Kurchatov institute”)                         |                                                                          |                                                                          |
| Type of scan                                                   | $\omega$                                                                 |                                                                          |                                                                          | $\phi$                                                                   |                                                                          |                                                                          |
| $2\theta_{\text{max}}$ , deg                                   | 71.87                                                                    | 67.21                                                                    | 62.25                                                                    | 61.99                                                                    | 63.74                                                                    | 61.81                                                                    |
| Limits $h, k, l$                                               | $-17 \leq h \leq 17$ ,<br>$-11 \leq k \leq 17$ ,<br>$-62 \leq l \leq 59$ | $-16 \leq h \leq 16$ ,<br>$-15 \leq k \leq 16$ ,<br>$-58 \leq l \leq 58$ | $-15 \leq h \leq 15$ ,<br>$-11 \leq k \leq 15$ ,<br>$-53 \leq l \leq 54$ | $-13 \leq h \leq 13$ ,<br>$-14 \leq k \leq 14$ ,<br>$-49 \leq l \leq 49$ | $-14 \leq h \leq 10$ ,<br>$-14 \leq k \leq 14$ ,<br>$-52 \leq l \leq 50$ | $-13 \leq h \leq 13$ ,<br>$-13 \leq k \leq 13$ ,<br>$-48 \leq l \leq 48$ |
| No. of reflections:<br>measured/unique<br>( $I > 2\sigma(I)$ ) | 3898/2975                                                                | 30566/3348                                                               | 26670/2708                                                               | 10569/1953                                                               | 7278/2229                                                                | 20560/1906                                                               |

|                                 |                                       |                                       |                                       |                                              |                                              |                                              |
|---------------------------------|---------------------------------------|---------------------------------------|---------------------------------------|----------------------------------------------|----------------------------------------------|----------------------------------------------|
| No. of parameters in refinement | 146                                   | 143                                   | 151                                   | 148                                          | 153                                          |                                              |
| Weighting scheme                | $1/[\sigma^2(F_0^2) + (0.0063P)^2]$ , | $1/[\sigma^2(F_0^2) + (0.0122P)^2]$ , | $1/[\sigma^2(F_0^2) + (0.0382P)^2]$ , | $1/[\sigma^2(F_0^2) + (0.0494P)^2 + 19.61P]$ | $1/[\sigma^2(F_0^2) + (0.0932P)^2 + 72.04P]$ | $1/[\sigma^2(F_0^2) + (0.0506P)^2 + 19.09P]$ |
|                                 | $P = (F_0^2 + 2F_c^2)/3$              |                                       |                                       |                                              |                                              |                                              |
| $R_1 (I > 2\sigma(I))$          | 0.0355                                | 0.0481                                | 0.0379                                | 0.0313                                       | 0.0448                                       | 0.0339                                       |
| $wR_2$                          | 0.0472                                | 0.0724                                | 0.0871                                | 0.0837                                       | 0.1566                                       | 0.0876                                       |
| $S$                             | 0.858                                 | 0.816                                 | 0.960                                 | 1.105                                        | 1.093                                        | 1.022                                        |

**Table S2.** Coordinates of atoms, displacement parameters  $U_{eq} \times 10^2$  ( $\text{\AA}^2$ ), and site occupancies  $p$  (SOF) in the structures of undoped and Mn- and Co-doped  $\text{Ca}_3(\text{VO}_4)_2$  crystals according to the single-crystal X-ray diffraction (D) and single-crystal synchrotron X-ray diffraction (S)

| Method                       | D                                |                                                    |                                                    | S                            |                                                    |                                                    |
|------------------------------|----------------------------------|----------------------------------------------------|----------------------------------------------------|------------------------------|----------------------------------------------------|----------------------------------------------------|
| Sample/<br>Parameter         | $\text{Ca}_3(\text{VO}_4)_2$ [6] | $\text{Ca}_3(\text{VO}_4)_2:\text{Mn}_2\text{O}_3$ | $\text{Ca}_3(\text{VO}_4)_2:\text{Co}_3\text{O}_4$ | $\text{Ca}_3(\text{VO}_4)_2$ | $\text{Ca}_3(\text{VO}_4)_2:\text{Mn}_2\text{O}_3$ | $\text{Ca}_3(\text{VO}_4)_2:\text{Co}_3\text{O}_4$ |
| <b>Ca1</b> ( <i>18b</i> , 1) |                                  |                                                    |                                                    |                              |                                                    |                                                    |
| $x$                          | 0.72979(3)                       | 0.2704(2)                                          | 0.2703(2)                                          | 0.1473(2)                    | 0.1474(3)                                          | 0.1479(2)                                          |
| $y$                          | 0.85277(3)                       | 0.1477(2)                                          | 0.1476(1)                                          | 0.2702(2)                    | 0.2702(3)                                          | 0.2706(2)                                          |

|                             |            |            |            |            |            |            |
|-----------------------------|------------|------------|------------|------------|------------|------------|
| $z$                         | 0.05702(2) | 0.94200(5) | 0.94310(4) | 0.55705(4) | 0.55688(7) | 0.55695(4) |
| $p$                         | 1.0        | 1.0        | 1.0        | 1.0        | 1.0        | 1.0        |
| $U_{\text{eq}}$             | 2.542(7)   | 2.54(4)    | 2.39(3)    | 3.29(4)    | 2.52(5)    | 2.71(4)    |
| <b>Ca2/Mn2/Co2 (18b, 1)</b> |            |            |            |            |            |            |
| $x$                         | 0.72597(3) | 0.2739(2)  | 0.2741(1)  | -0.1960(1) | -0.1965(2) | -0.1965(1) |
| $y$                         | 0.86262(3) | 0.1372(2)  | 0.1375(1)  | 0.1964(1)  | 0.1964(2)  | 0.1965(1)  |
| $z$                         | 0.16360(2) | 0.83540(4) | 0.83625(3) | 0.49694(3) | 0.49695(6) | 0.49712(4) |
| $p(\text{Ca2})$             | 1.0        | 1.0        | 1.0        | 1.0        | 0.900(5)   | 0.940(22)  |
| $p(\text{Mn2/Co2})$         |            |            |            |            | 0.100(5)   | 0.060(22)  |
| $U_{\text{eq}}$             | 1.654(6)   | 1.68(4)    | 1.57(3)    | 2.31(3)    | 1.89(6)    | 2.05(5)    |
| <b>Ca3/Mn3/Co3 (18b, 1)</b> |            |            |            |            |            |            |
| $x$                         | 0.61303(3) | 0.3868(2)  | 0.3868(1)  | 0.5108(1)  | 0.5107(2)  | 0.5103(1)  |
| $y$                         | 0.82217(3) | 0.1776(2)  | 0.1775(1)  | 0.4571(1)  | 0.4568(2)  | 0.4565(1)  |
| $z$                         | 0.96589(2) | 0.03325(5) | 0.03433(3) | 0.63272(3) | 0.63250(5) | 0.63247(3) |
| $p(\text{Ca3})$             | 1.0        | 0.971(9)   | 0.8850(4)  | 1.0        | 0.892(4)   | 0.951(19)  |
| $p(\text{Mn3/Co3})$         |            | 0.029(9)   | 0.1150(4)  |            | 0.108(4)   | 0.049(19)  |
| $U_{\text{eq}}$             | 1.500(6)   | 1.44(4)    | 1.65(3)    | 2.13(3)    | 1.78(6)    | 1.85(4)    |

|                                     |            |           |            |            |           |            |
|-------------------------------------|------------|-----------|------------|------------|-----------|------------|
| <b>Ca4/Mn4/Co4</b> ( <i>6a</i> , 3) |            |           |            |            |           |            |
| <i>x</i>                            | 0          | 0         | 0          | 2/3        | 2/3       | 2/3        |
| <i>y</i>                            | 0          | 0         | 0          | 1/3        | 1/3       | 1/3        |
| <i>z</i>                            | 0.73426(2) | 0.2649(1) | 0.26562(6) | 0.56746(7) | 0.5678(1) | 0.56784(6) |
| <i>p</i> (Ca4)                      | 0.33333    | 0.306(3)  | 0.3130(2)  | 0.33333    | 0.291(24) | 0.281(10)  |
| <i>p</i> (Mn4/Co4)                  |            | 0.028(3)  | 0.0200(2)  |            | 0.042(24) | 0.052      |
| <i>U</i> <sub>eq</sub>              | 2.027(9)   | 2.00(8)   | 1.46(4)    | 2.56(4)    | 2.04(9)   | 2.18(7)    |
| <b>Ca5/Mn5</b> ( <i>18b</i> , 1)    |            |           |            |            |           |            |
| <i>x</i>                            | 0.9503(3)  | 0.939(1)  | 0.053(1)   | -0.013(2)  | -0.016(1) | -0.014(1)  |
| <i>y</i>                            | 0.9308(3)  | 0.985(2)  | 0.070(1)   | -0.056(2)  | -0.069(2) | -0.064(1)  |
| <i>z</i>                            | 0.92216(7) | 0.0769(5) | 0.0786(4)  | 0.4209(3)  | 0.4218(4) | 0.4223(2)  |
| <i>p</i> (Ca5)                      | 0.14636    | 0.150(9)  | 0.167(6)   | 0.147(8)   | 0.172(12) | 0.178(8)   |
| <i>p</i> (Mn5)                      | -          | 0.017(9)  | -          | -          | -         | -          |
| <i>U</i> <sub>eq</sub>              | 4.39(7)    | 3.93(8)   | 5.9(3)     | 4.4(3)     | 3.8(5)    | 4.3(3)     |
| <b>Ca5A</b> ( <i>6a</i> , 3)        |            |           |            |            |           |            |
| <i>x</i>                            | 0          |           |            | 0          |           |            |
| <i>y</i>                            | 0          |           |            | 0          |           |            |

|                    |            |            |            |                       |            |                       |
|--------------------|------------|------------|------------|-----------------------|------------|-----------------------|
| $z$                | 0.9190(1)  |            |            | 0.427(5)              |            |                       |
| $p$                | 0.05051    |            |            | 0.011(6) <sup>a</sup> |            |                       |
| $U_{\text{eq}}$    | 4.39(7)    |            |            | 4.4(3)                |            |                       |
| <b>V1 (18b, 1)</b> |            |            |            |                       |            |                       |
| $x$                | 0.68951(2) | 0.3103(2)  | 0.3102(1)  | 0.4711(1)             | 0.4705(2)  | 0.4707(1)             |
| $y$                | 0.86258(2) | 0.1374(2)  | 0.1374(1)  | 0.4934(1)             | 0.4930(2)  | 0.4929(1)             |
| $z$                | 0.86751(2) | 0.13153(4) | 0.13245(3) | 0.53407(3)            | 0.53425(5) | 0.53428(3)            |
| $p$                | 1.0        | 1.0        | 1.0        | 1.0                   | 1.0        | 1.0                   |
| $U_{\text{eq}}$    | 1.815(5)   | 1.85(4)    | 1.65(3)    | 2.52(3)               | 2.12(5)    | 2.18(4)               |
| <b>V2 (18b, 1)</b> |            |            |            |                       |            |                       |
| $x$                | 0.65050(2) | 0.3496(1)  | 0.3490(1)  | 0.8172(1)             | 0.8166(2)  | 0.8165(1)             |
| $y$                | 0.84949(2) | 0.1503(2)  | 0.1499(1)  | 0.6826(1)             | 0.6828(2)  | 0.6828(1)             |
| $z$                | 0.76527(2) | 0.23382(4) | 0.23492(3) | 0.59856(3)            | 0.59863(4) | 0.59851(3)            |
| $p$                | 1.0        | 0.988(6)   | 1.0        | 1.0                   | 1.0        | 0.998(9) <sup>a</sup> |
| $U_{\text{eq}}$    | 1.220(5)   | 1.10(4)    | 1.13(2)    | 1.93(2)               | 1.51(4)    | 1.64(4)               |
| <b>V3 (6a, 3)</b>  |            |            |            |                       |            |                       |
| $x$                | 0          | 0          | 0          | 0                     | 0          | 0                     |

|                    |            |                       |            |            |            |                       |
|--------------------|------------|-----------------------|------------|------------|------------|-----------------------|
| $y$                | 0          | 0                     | 0          | 0          | 0          | 0                     |
| $z$                | 0.99997(2) | 0.99914(6)            | 0.00008(4) | 0.50002(5) | 0.49977(8) | 0.49993(5)            |
| $p$                | 0.33333    | 0.330(6) <sup>a</sup> | 0.3333     | 0.33333    | 0.326(8)   | 0.333(5) <sup>a</sup> |
| $U_{\text{eq}}$    | 1.240(7)   | 1.25(5)               | 1.19(4)    | 1.93(4)    | 1.4(1)     | 1.61(7)               |
| <b>O1</b> (18b, 1) |            |                       |            |            |            |                       |
| $x$                | 0.7263(2)  | 0.274(1)              | 0.2669(8)  | 0.414(1)   | 0.411(2)   | 0.410(1)              |
| $y$                | 0.9208(1)  | 0.079(1)              | 0.0753(7)  | 0.4715(9)  | 0.470(1)   | 0.4694(8)             |
| $z$                | 0.90956(3) | 0.0898(2)             | 0.0904(2)  | 0.5760(2)  | 0.5769(3)  | 0.5761(2)             |
| $p$                | 1.0        | 1.0                   | 1.0        | 1.0        | 1.0        | 1.0                   |
| $U_{\text{eq}}$    | 6.65(5)    | 6.3(3)                | 6.1(2)     | 7.6(3)     | 5.8(4)     | 5.9(2)                |
| <b>O2</b> (18b, 1) |            |                       |            |            |            |                       |
| $x$                | 0.7716(1)  | 0.2280(9)             | 0.2266(5)  | 0.5619(7)  | 0.564(1)   | 0.5632(7)             |
| $y$                | 0.7726(1)  | 0.2253(9)             | 0.2263(5)  | 0.6656(6)  | 0.6672(9)  | 0.6657(6)             |
| $z$                | 0.85424(3) | 0.1447(2)             | 0.1453(1)  | 0.5211(2)  | 0.5209(3)  | 0.5210(2)             |
| $p$                | 1.0        | 1.0                   | 1.0        | 1.0        | 1.0        | 1.0                   |
| $U_{\text{eq}}$    | 3.93(3)    | 3.4(2)                | 3.6(1)     | 4.2(1)     | 3.5(2)     | 3.5(1)                |
| <b>O3</b> (18b, 1) |            |                       |            |            |            |                       |

|                    |            |           |           |           |           |           |
|--------------------|------------|-----------|-----------|-----------|-----------|-----------|
| $x$                | 0.72092(9) | 0.2791(6) | 0.2780(4) | 0.3217(5) | 0.3215(8) | 0.3226(5) |
| $y$                | 0.01174(9) | 0.9889(6) | 0.9876(4) | 0.3757(5) | 0.3752(8) | 0.3755(5) |
| $z$                | 0.84407(2) | 0.1552(2) | 0.1561(1) | 0.5110(1) | 0.5106(2) | 0.5106(1) |
| $p$                | 1.0        | 1.0       | 1.0       | 1.0       | 1.0       | 1.0       |
| $U_{\text{eq}}$    | 1.51(2)    | 1.7(1)    | 1.42(9)   | 2.21(8)   | 1.6(1)    | 1.76(8)   |
| <b>O4 (18b, 1)</b> |            |           |           |           |           |           |
| $x$                | 0.5090(1)  | 0.4872(8) | 0.4887(6) | 0.5844(7) | 0.585(1)  | 0.5846(7) |
| $y$                | 0.7482(1)  | 0.2496(9) | 0.2507(6) | 0.4275(7) | 0.426(1)  | 0.4268(7) |
| $z$                | 0.85951(4) | 0.1384(3) | 0.1391(2) | 0.5265(2) | 0.5262(4) | 0.5266(3) |
| $p$                | 1.0        | 1.0       | 1.0       | 1.0       | 1.0       | 1.0       |
| $U_{\text{eq}}$    | 4.99(4)    | 5.1(3)    | 5.1(2)    | 5.7(2)    | 4.5(3)    | 4.9(2)    |
| <b>O5 (18b, 1)</b> |            |           |           |           |           |           |
| $x$                | 0.6279(1)  | 0.3738(8) | 0.3738(5) | 0.8470(7) | 0.847(1)  | 0.8469(7) |
| $y$                | 0.8205(1)  | 0.1810(8) | 0.1809(5) | 0.7064(7) | 0.708(1)  | 0.7075(7) |
| $z$                | 0.72142(2) | 0.2775(2) | 0.2788(1) | 0.5548(2) | 0.5543(3) | 0.5545(2) |
| $p$                | 1.0        | 1.0       | 1.0       | 1.0       | 1.0       | 1.0       |
| $U_{\text{eq}}$    | 2.98(3)    | 2.8(1)    | 2.8(1)    | 3.6(1)    | 2.9(2)    | 3.0(1)    |



|                    |            |           |           |           |           |           |
|--------------------|------------|-----------|-----------|-----------|-----------|-----------|
| <b>O6</b> (18b, 1) |            |           |           |           |           |           |
| <i>x</i>           | 0.5954(1)  | 0.4043(8) | 0.4039(5) | 0.7006(7) | 0.699(1)  | 0.6992(7) |
| <i>y</i>           | 0.9657(1)  | 0.0335(8) | 0.0316(5) | 0.7383(6) | 0.738(1)  | 0.7376(6) |
| <i>z</i>           | 0.77539(3) | 0.2236(2) | 0.2250(1) | 0.6088(1) | 0.6090(2) | 0.6087(1) |
| <i>p</i>           | 1.0        | 1.0       | 1.0       | 1.0       | 1.0       | 1.0       |
| $U_{\text{eq}}$    | 3.49(3)    | 3.2(2)    | 2.9(1)    | 4.0(1)    | 3.5(2)    | 3.6(1)    |
| <b>O7</b> (18b, 1) |            |           |           |           |           |           |
| <i>x</i>           | 0.5658(2)  | 0.435(1)  | 0.4311(7) | 0.9803(8) | 0.982(1)  | 0.9808(8) |
| <i>y</i>           | 0.6851(1)  | 0.3117(9) | 0.3126(6) | 0.7658(8) | 0.766(1)  | 0.7661(7) |
| <i>z</i>           | 0.78368(4) | 0.2141(3) | 0.2153(2) | 0.6174(2) | 0.6171(3) | 0.6172(2) |
| <i>p</i>           | 1.0        | 1.0       | 1.0       | 1.0       | 1.0       | 1.0       |
| $U_{\text{eq}}$    | 5.33(5)    | 5.7(3)    | 4.8(2)    | 5.7(2)    | 4.4(3)    | 5.0(2)    |
| <b>O8</b> (18b, 1) |            |           |           |           |           |           |
| <i>x</i>           | 0.82562(8) | 0.1738(6) | 0.1737(4) | 0.7430(5) | 0.7430(8) | 0.7426(5) |
| <i>y</i>           | 0.9240(1)  | 0.0764(8) | 0.0751(4) | 0.5077(5) | 0.5076(8) | 0.5064(5) |
| <i>z</i>           | 0.77725(2) | 0.2219(2) | 0.2234(1) | 0.6104(1) | 0.6105(2) | 0.6100(1) |
| <i>p</i>           | 1.0        | 1.0       | 1.0       | 1.0       | 1.0       | 1.0       |

|                     |            |           |           |            |            |            |
|---------------------|------------|-----------|-----------|------------|------------|------------|
| $U_{eq}$            | 1.61(2)    | 1.7(1)    | 1.55(9)   | 2.48(9)    | 1.9(1)     | 2.26(9)    |
| <b>O9</b> (6a, 3)   |            |           |           |            |            |            |
| $x$                 | 0          | 0         | 0         | 0          | 0          | 0          |
| $y$                 | 0          | 0         | 0         | 0          | 0          | 0          |
| $z$                 | 0.04396(5) | 0.9552(4) | 0.9560(2) | 0.5440(3)  | 0.5443(4)  | 0.5437(3)  |
| $p$                 | 0.33333    | 0.33333   | 0.33333   | 0.33333    | 0.33333    | 0.33333    |
| $U_{eq}$            | 4.35(6)    | 3.6(3)    | 4.0(3)    | 5.3(3)     | 3.7(4)     | 4.2(3)     |
| <b>O10</b> (18b, 1) |            |           |           |            |            |            |
| $x$                 | 0.0092(1)  | 0.9901(9) | 0.9905(6) | 0.1453(6)  | 0.1462(9)  | 0.1459(5)  |
| $y$                 | 0.8539(1)  | 0.1445(7) | 0.1456(5) | -0.0104(6) | -0.0094(9) | -0.0092(6) |
| $z$                 | 0.98707(4) | 0.0120(3) | 0.0130(2) | 0.4873(2)  | 0.4872(3)  | 0.4870(2)  |
| $p$                 | 1.0        | 1.0       | 1.0       | 1.0        | 1.0        | 1.0        |
| $U_{eq}$            | 3.45(3)    | 3.2(2)    | 3.2(1)    | 3.9(1)     | 3.1(2)     | 3.2(1)     |

<sup>a</sup> taking into account  $3\sigma$ , the site is defect-free.

**Table S3.** Main interatomic distances  $d$  (Å) in the structures of undoped and Mn- and Co-doped  $\text{Ca}_3(\text{VO}_4)_2$  crystals according to the single-crystal X-ray diffraction (D) and single-crystal synchrotron X-ray diffraction (S)

| Method                       | D                                |                                                    |                                                    | S                            |                                                    |                                                    |
|------------------------------|----------------------------------|----------------------------------------------------|----------------------------------------------------|------------------------------|----------------------------------------------------|----------------------------------------------------|
| Sample/<br>Parameter         | $\text{Ca}_3(\text{VO}_4)_2$ [6] | $\text{Ca}_3(\text{VO}_4)_2:\text{Mn}_2\text{O}_3$ | $\text{Ca}_3(\text{VO}_4)_2:\text{Co}_3\text{O}_4$ | $\text{Ca}_3(\text{VO}_4)_2$ | $\text{Ca}_3(\text{VO}_4)_2:\text{Mn}_2\text{O}_3$ | $\text{Ca}_3(\text{VO}_4)_2:\text{Co}_3\text{O}_4$ |
| Ca1 – O6                     | 2.398(1)                         | 2.397(7)                                           | 2.388(5)                                           | 2.399(5)                     | 2.370(9)                                           | 2.394(5)                                           |
| – O3                         | 2.408(1)                         | 2.411(7)                                           | 2.401(5)                                           | 2.403(5)                     | 2.368(7)                                           | 2.405(5)                                           |
| – O2                         | 2.503(1)                         | 2.515(7)                                           | 2.488(6)                                           | 2.498(6)                     | 2.443(9)                                           | 2.487(5)                                           |
| – O9                         | 2.580(1)                         | 2.581(3)                                           | 2.574(2)                                           | 2.582(3)                     | 2.535(4)                                           | 2.579(3)                                           |
| – O5                         | 2.594(1)                         | 2.575(8)                                           | 2.572(5)                                           | 2.586(7)                     | 2.539(10)                                          | 2.578(6)                                           |
| – O7                         | 2.642(1)                         | 2.689(9)                                           | 2.685(7)                                           | 2.660(8)                     | 2.605(12)                                          | 2.646(8)                                           |
| – O1                         | 2.694(2)                         | 2.686(9)                                           | 2.669(7)                                           | 2.699(9)                     | 2.637(15)                                          | 2.654(9)                                           |
| – O5                         | 2.713(2)                         | 2.713(7)                                           | 2.706(6)                                           | 2.713(6)                     | 2.661(9)                                           | 2.699(6)                                           |
| $[\text{Ca1-O}]_{\text{av}}$ | 2.567                            | 2.571                                              | 2.560                                              | 2.568                        | 2.520                                              | 2.555                                              |
| Ca2/Mn2/Co2 – O7             | 2.298(1)                         | 2.275(9)                                           | 2.285(6)                                           | 2.298(7)                     | 2.258(11)                                          | 2.297(7)                                           |
| – O5                         | 2.383(1)                         | 2.385(7)                                           | 2.372(5)                                           | 2.388(6)                     | 2.335(11)                                          | 2.370(7)                                           |
| – O6                         | 2.428(1)                         | 2.421(8)                                           | 2.442(5)                                           | 2.422(6)                     | 2.376(9)                                           | 2.425(6)                                           |

|                               |          |          |          |          |           |          |
|-------------------------------|----------|----------|----------|----------|-----------|----------|
| – O4                          | 2.448(2) | 2.473(9) | 2.468(7) | 2.461(7) | 2.417(11) | 2.451(7) |
| – O3                          | 2.477(1) | 2.473(7) | 2.480(5) | 2.475(5) | 2.426(7)  | 2.455(4) |
| – O10                         | 2.499(1) | 2.513(8) | 2.499(5) | 2.508(6) | 2.461(9)  | 2.500(6) |
| – O4                          | 2.573(2) | 2.588(9) | 2.593(7) | 2.576(8) | 2.515(12) | 2.560(8) |
| [Ca2/Mn2/Co2–O] <sub>av</sub> | 2.444    | 2.447    | 2.448    | 2.447    | 2.398     | 2.437    |
| Ca3/Mn3/Co3 – O3              | 2.350(1) | 2.346(6) | 2.342(4) | 2.356(5) | 2.314(7)  | 2.357(5) |
| – O10                         | 2.382(2) | 2.384(8) | 2.378(6) | 2.378(5) | 2.345(8)  | 2.376(5) |
| – O2                          | 2.400(1) | 2.408(8) | 2.414(6) | 2.399(6) | 2.353(10) | 2.395(6) |
| – O8                          | 2.428(1) | 2.433(8) | 2.424(5) | 2.439(5) | 2.395(8)  | 2.437(5) |
| – O1                          | 2.432(1) | 2.430(9) | 2.449(6) | 2.439(8) | 2.372(12) | 2.431(8) |
| – O8                          | 2.456(1) | 2.447(8) | 2.463(5) | 2.455(5) | 2.408(7)  | 2.442(5) |
| – O6                          | 2.828(1) | 2.820(8) | 2.815(5) | 2.836(6) | 2.781(10) | 2.823(6) |
| – O7                          | 2.901(2) | 2.910(9) | 2.861(7) | 2.885(8) | 2.832(12) | 2.871(8) |
| [Ca3/Mn3/Co3–O] <sub>av</sub> | 2.522    | 2.522    | 2.518    | 2.523    | 2.475     | 2.517    |
| Ca4/Mn4/Co4 – 3 × O4          | 2.277(1) | 2.268(8) | 2.256(6) | 2.272(7) | 2.237(11) | 2.265(7) |
| – 3 × O8                      | 2.313(1) | 2.304(7) | 2.284(5) | 2.312(5) | 2.265(9)  | 2.276(5) |
| [Ca4/Mn4/Co4–O] <sub>av</sub> | 2.295    | 2.286    | 2.270    | 2.292    | 2.251     | 2.271    |

|                           |          |          |          |          |           |          |
|---------------------------|----------|----------|----------|----------|-----------|----------|
| Ca5/Mn5 – O1              | 2.416(4) | 2.41(2)  | 2.32(2)  | 2.43(2)  | 2.35(2)   | 2.40(1)  |
| – O1                      | 2.427(4) | 2.47(2)  | 2.38(2)  | 2.50(2)  | 2.42(2)   | 2.48(2)  |
| – O10                     | 2.778(3) | 2.79(2)  | 2.81(2)  | 2.86(1)  | 2.762(18) | 2.79(1)  |
| – O10                     | 2.925(3) | 2.89(2)  | 2.92(2)  | 2.95(1)  | 2.874(18) | 2.89(1)  |
| [Ca5/Mn5–O] <sub>av</sub> | 2.637    | 2.64     | 2.61     | 2.69     | 2.602     | 2.64     |
| Ca5A – 3 × O1             | 2.660(2) | 2.66(1)  | 2.603(9) | 2.74(5)  | 2.61(2)   | 2.46(15) |
| – 3 × O10                 | 3.059(4) | 3.04(6)  | 3.00(2)  | 2.8(1)   | 3.00(2)   | 2.86(8)  |
| [Ca5A–O] <sub>av</sub>    | 2.860    | 2.85     | 2.802    | 2.77     | 2.81      | 2.66     |
| V1 – O2                   | 1.688(1) | 1.669(7) | 1.684(6) | 1.688(6) | 1.682(9)  | 1.691(6) |
| – O1                      | 1.691(1) | 1.675(9) | 1.704(6) | 1.682(7) | 1.685(12) | 1.683(7) |
| – O3                      | 1.721(1) | 1.717(6) | 1.725(5) | 1.716(5) | 1.697(7)  | 1.714(5) |
| – O4                      | 1.736(1) | 1.694(8) | 1.705(6) | 1.722(8) | 1.715(12) | 1.725(8) |
| [V1–O] <sub>av</sub>      | 1.709    | 1.689    | 1.705    | 1.702    | 1.695     | 1.703    |
| V2 – O6                   | 1.681(1) | 1.684(7) | 1.695(5) | 1.692(6) | 1.666(9)  | 1.686(6) |
| – O7                      | 1.690(1) | 1.685(9) | 1.692(6) | 1.687(7) | 1.673(11) | 1.690(7) |
| – O5                      | 1.691(1) | 1.684(7) | 1.695(5) | 1.689(6) | 1.685(9)  | 1.695(6) |
| – O8                      | 1.707(1) | 1.712(6) | 1.700(4) | 1.704(5) | 1.680(8)  | 1.711(5) |

|               |          |          |          |          |           |          |
|---------------|----------|----------|----------|----------|-----------|----------|
| $[V2-O]_{av}$ | 1.692    | 1.691    | 1.696    | 1.693    | 1.676     | 1.696    |
| V3 – O9       | 1.673(2) | 1.67(1)  | 1.675(9) | 1.67(1)  | 1.664(17) | 1.66(1)  |
| – 3 × O10     | 1.703(1) | 1.688(6) | 1.696(5) | 1.701(5) | 1.673(7)  | 1.697(5) |
| $[V3-O]_{av}$ | 1.696    | 1.684    | 1.691    | 1.693    | 1.671     | 1.688    |

**Table S4.** Crystallographic data, experimental details and parameters of diffusion-doped  $\text{Ca}_3(\text{VO}_4)_2\text{:Mn}_2\text{O}_3$  and  $\text{Ca}_3(\text{VO}_4)_2\text{:Co}_3\text{O}_4$  crystal structure refinement according to the synchrotron X-ray powder diffraction (P).

| Sample/Parameter     | $\text{Ca}_3(\text{VO}_4)_2\text{:Mn}_2\text{O}_3$ | $\text{Ca}_3(\text{VO}_4)_2\text{:Co}_3\text{O}_4$ |
|----------------------|----------------------------------------------------|----------------------------------------------------|
| Space group          | $R3c$                                              |                                                    |
| $a$ , Å              | 10.81176(8)                                        | 10.80154(11)                                       |
| $c$ , Å              | 38.0173(3)                                         | 37.9672(5)                                         |
| $V$ , Å <sup>3</sup> | 3848.62(5)                                         | 3836.28(8)                                         |
| Scherrer size, nm    | 164.3                                              | 631.5                                              |
| Microstrains, %      | 0.14                                               | 0.25                                               |
| Admixture phase      | -                                                  | CoO, 5.6%                                          |
| $R_p$                | 1.39                                               | 3.56                                               |
| $wR_p$               | 1.84                                               | 4.85                                               |
| $R_{\text{Bragg}}$   | 2.32                                               | 5.10                                               |

**Table S5.** Coordinates of atoms, displacement parameters  $U_{\text{eq}} \times 10^2$  ( $\text{\AA}^2$ ), and site occupancies  $p$  (SOF) in the structures of Mn- and Co-doped  $\text{Ca}_3(\text{VO}_4)_2$  crystals according to powder synchrotron X-ray diffraction (P)

| Sample/Parameter | $\text{Ca}_3(\text{VO}_4)_2:\text{Mn}_2\text{O}_3$ | $\text{Ca}_3(\text{VO}_4)_2:\text{Co}_3\text{O}_4$ | Sample/Parameter | $\text{Ca}_3(\text{VO}_4)_2:\text{Mn}_2\text{O}_3$ | $\text{Ca}_3(\text{VO}_4)_2:\text{Co}_3\text{O}_4$ |
|------------------|----------------------------------------------------|----------------------------------------------------|------------------|----------------------------------------------------|----------------------------------------------------|
| <b>Ca1</b>       |                                                    |                                                    | <b>O1</b>        |                                                    |                                                    |
| $x$              | 0.2683(2)                                          | 0.2671(3)                                          | $x$              | 0.2724(7)                                          | 0.2671(12)                                         |
| $y$              | 0.1482(2)                                          | 0.1518(4)                                          | $y$              | 0.0763(6)                                          | 0.0722(11)                                         |
| $z$              | 0.9465(7)                                          | 0.9457(4)                                          | $z$              | 0.0958(7)                                          | 0.0947(3)                                          |
| $p$              | 1.0                                                | 1.0                                                | $p$              | 1.0                                                | 1.0                                                |
| $U_{\text{eq}}$  | 2.72(5)                                            | 0.37(4)                                            | $U_{\text{eq}}$  | 4.9(2)                                             | 2.5(4)                                             |
| <b>Ca2/Co2</b>   |                                                    |                                                    | <b>O2</b>        |                                                    |                                                    |
| $x$              | 0.2711(3)                                          | 0.2747(3)                                          | $x$              | 0.2274(9)                                          | 0.2206(18)                                         |
| $y$              | 0.1359(3)                                          | 0.1433(5)                                          | $y$              | 0.2236(8)                                          | 0.2237(17)                                         |
| $z$              | 0.8401(7)                                          | 0.8391(4)                                          | $z$              | 0.1466(7)                                          | 0.1457(5)                                          |
| $p(\text{Ca2})$  | 1.0                                                | 0.917(11)                                          | $p$              | 1.0                                                | 1.0                                                |
| $p(\text{Co2})$  |                                                    | 0.083(11)                                          | $U_{\text{eq}}$  | 4.1(2)                                             | 5.4(5)                                             |
| $U_{\text{eq}}$  | 2.01(6)                                            | 2.19(9)                                            |                  |                                                    |                                                    |
| <b>Ca3/Mn3</b>   |                                                    |                                                    | <b>O3</b>        |                                                    |                                                    |



|                        |            |            |                        |            |             |
|------------------------|------------|------------|------------------------|------------|-------------|
| <i>x</i>               | 0.3876(2)  | 0.3885(4)  | <i>x</i>               | 0.2824(7)  | 0.2866(13)  |
| <i>y</i>               | 0.1788(3)  | 0.1814(6)  | <i>y</i>               | -0.0095(6) | -0.0053(12) |
| <i>z</i>               | 0.0376(7)  | 0.0371(4)  | <i>z</i>               | 0.1604(7)  | 0.1584(4)   |
| <i>p</i> (Ca3)         | 0.938(8)   | 1.0        | <i>p</i>               | 1.0        | 1.0         |
| <i>p</i> (Mn3)         | 0.062(8)   |            | <i>U</i> <sub>eq</sub> | 0.27(17)   | 0.2(3)      |
| <i>U</i> <sub>eq</sub> | 1.44(6)    | 1.61(9)    |                        |            |             |
| <b>Ca4/Mn4/Co4</b>     |            |            | <b>O4</b>              |            |             |
| <i>x</i>               | 0          | 0          | <i>x</i>               | 0.4807(6)  | 0.4879(11)  |
| <i>y</i>               | 0          | 0          | <i>y</i>               | 0.2470(9)  | 0.2484(17)  |
| <i>z</i>               | 0.2687(7)  | 0.2684(4)  | <i>z</i>               | 0.1410(7)  | 0.1402(6)   |
| <i>p</i> (Ca4)         | 0.893(11)  | 0.812(14)  | <i>p</i>               | 1.0        | 1.0         |
| <i>p</i> (Mn4/Co4)     | 0.107(11)  | 0.188(14)  | <i>U</i> <sub>eq</sub> | 5.5(2)     | 4.3(4)      |
| <i>U</i> <sub>eq</sub> | 0.88(8)    | 1.11(12)   |                        |            |             |
| <b>Ca5</b>             |            |            | <b>O5</b>              |            |             |
| <i>x</i>               | 0.057(2)   | -0.020(7)  | <i>x</i>               | 0.3694(5)  | 0.3684(11)  |
| <i>y</i>               | 0.0858(15) | 0.037(6)   | <i>y</i>               | 0.1750(7)  | 0.1755(16)  |
| <i>z</i>               | 0.0832(10) | 0.0816(12) | <i>z</i>               | 0.2821(7)  | 0.2812(5)   |

|                 |           |            |                 |           |            |
|-----------------|-----------|------------|-----------------|-----------|------------|
| $p$             | 0.118(11) | 0.114(2)   | $p$             | 1.0       | 1.0        |
| $U_{\text{eq}}$ | 3.4(5)    | 4.3(9)     | $U_{\text{eq}}$ | 3.6(2)    | 3.9(4)     |
| <b>Ca5A</b>     |           |            | <b>O6</b>       |           |            |
| $x$             | 0         | 0          | $x$             | 0.4054(6) | 0.3984(11) |
| $y$             | 0         | 0          | $y$             | 0.0369(6) | 0.0332(9)  |
| $z$             | 0.0765(5) | 0.0844(19) | $z$             | 0.2270(7) | 0.2244(5)  |
| $p$             | 0.194(10) | 0.168(6)   | $p$             | 1.0       | 1.0        |
| $U_{\text{eq}}$ | 3.4(5)    | 2.4(9)     | $U_{\text{eq}}$ | 1.8(2)    | 1.80(17)   |
| <b>V1</b>       |           |            | <b>O7</b>       |           |            |
| $x$             | 0.3101(2) | 0.3113(3)  | $x$             | 0.4392(9) | 0.4445(14) |
| $y$             | 0.1385(2) | 0.1423(4)  | $y$             | 0.3190(8) | 0.3197(13) |
| $z$             | 0.1361(7) | 0.1356(4)  | $z$             | 0.2186(6) | 0.2193(5)  |
| $p$             | 1.0       | 1.0        | $p$             | 1.0       | 1.0        |
| $U_{\text{eq}}$ | 1.53(5)   | 1.73(10)   | $U_{\text{eq}}$ | 4.0(2)    | 1.8(4)     |
| <b>V2</b>       |           |            | <b>O8</b>       |           |            |
| $x$             | 0.3487(2) | 0.3479(4)  | $x$             | 0.1686(5) | 0.1704(9)  |
| $y$             | 0.1486(2) | 0.1497(4)  | $y$             | 0.0771(7) | 0.0652(9)  |

|                 |           |           |                 |            |             |
|-----------------|-----------|-----------|-----------------|------------|-------------|
| $z$             | 0.2384(7) | 0.2379(4) | $z$             | 0.2254(7)  | 0.2224(4)   |
| $p$             | 1.0       | 1.0       | $p$             | 1.0        | 1.0         |
| $U_{\text{eq}}$ | 1.28(5)   | 0.92(8)   | $U_{\text{eq}}$ | 0.7(1)     | 1.0(2)      |
| <b>V3</b>       |           |           | <b>O9</b>       |            |             |
| $x$             | 0         | 0         | $x$             | 0          | 0           |
| $y$             | 0         | 0         | $y$             | 0          | 0           |
| $z$             | 0.0038(7) | 0.0033(4) | $z$             | 0.9570(6)  | 0.9590(8)   |
| $p$             | 0.33333   | 0.33333   | $p$             | 0.33333    | 0.33333     |
| $U_{\text{eq}}$ | 1.21(8)   | 0.23(12)  | $U_{\text{eq}}$ | 1.5(2)     | 4.7(7)      |
|                 |           |           | <b>O10</b>      |            |             |
|                 |           |           | $x$             | -0.0079(7) | -0.0001(15) |
|                 |           |           | $y$             | 0.1414(5)  | 0.1485(11)  |
|                 |           |           | $z$             | 0.0160(7)  | 0.0157(4)   |
|                 |           |           | $p$             | 1.0        | 1.0         |
|                 |           |           | $U_{\text{eq}}$ | 1.9(2)     | 2.5(4)      |

**Table S6.** Main interatomic distances  $d$  (Å) in the structures of undoped and Mn- and Co-doped  $\text{Ca}_3(\text{VO}_4)_2$  crystals according to powder synchrotron X-ray diffraction (P)

| Sample/Parameter      | $\text{Ca}_3(\text{VO}_4)_2:\text{Mn}_2\text{O}_3$ | $\text{Ca}_3(\text{VO}_4)_2:\text{Co}_3\text{O}_4$ |
|-----------------------|----------------------------------------------------|----------------------------------------------------|
| Ca1 – O6              | 2.45(3)                                            | 2.56(2)                                            |
| – O3                  | 2.44(3)                                            | 2.411(18)                                          |
| – O2                  | 2.50(2)                                            | 2.49(2)                                            |
| – O9                  | 2.548(6)                                           | 2.561(7)                                           |
| – O5                  | 2.61(2)                                            | 2.56(2)                                            |
| – O7                  | 2.65(3)                                            | 2.57(2)                                            |
| – O1                  | 2.65(2)                                            | 2.606(11)                                          |
| – O5                  | 2.71(2)                                            | 2.76(2)                                            |
| [Ca1–O] <sub>av</sub> | 2.57                                               | 2.56                                               |
| Ca2/Co2 – O7          | 2.22(3)                                            | 2.24(2)                                            |
| – O5                  | 2.39(3)                                            | 2.37(2)                                            |
| – O6                  | 2.39(3)                                            | 2.39(2)                                            |
| – O4                  | 2.50(2)                                            | 2.49(2)                                            |

|                               |          |           |
|-------------------------------|----------|-----------|
| – O3                          | 2.45(1)  | 2.47(2)   |
| – O10                         | 2.550(7) | 2.56(1)   |
| – O4                          | 2.63(3)  | 2.648(19) |
| [Ca2/Co2–O] <sub>av</sub>     | 2.45     | 2.45      |
| Ca3/Mn3 – O3                  | 2.34(3)  | 2.40(2)   |
| – O10                         | 2.44(1)  | 2.45(1)   |
| – O2                          | 2.50(3)  | 2.49(3)   |
| – O8                          | 2.40(2)  | 2.26(1)   |
| – O1                          | 2.51(3)  | 2.52(2)   |
| – O8                          | 2.44(1)  | 2.51(1)   |
| – O6                          | 2.82(3)  | 2.72(2)   |
| – O7                          | 2.94(3)  | 2.92(2)   |
| [Ca3/Mn3–O] <sub>av</sub>     | 2.55     | 2.53      |
| Ca4/Mn4/Co4 – 3 × O4          | 2.29(2)  | 2.22(2)   |
| – 3 × O8                      | 2.28(3)  | 2.37(2)   |
| [Ca4/Mn4/Co4–O] <sub>av</sub> | 2.285    | 2.295     |

|                        |          |         |
|------------------------|----------|---------|
| Ca5 – O1               | 2.33(3)  | 2.11(9) |
| – O1                   | 2.44(3)  | 2.40(5) |
| – O10                  | 2.79(3)  | 2.75(4) |
| – O10                  | 3.01(1)  | 2.95(4) |
| [Ca5–O] <sub>av</sub>  | 2.64     | 2.55    |
| Ca5A – 3 × O1          | 2.73(3)  | 2.61(2) |
| – 3 × O10              | 2.79(3)  | 2.76(3) |
| [Ca5A–O] <sub>av</sub> | 2.76     | 2.65    |
| V1 – O2                | 1.62(1)  | 1.66(2) |
| – O1                   | 1.64(3)  | 1.69(2) |
| – O3                   | 1.74(2)  | 1.71(2) |
| – O4                   | 1.628(7) | 1.67(1) |
| [V1-O] <sub>av</sub>   | 1.66     | 1.68    |
| V2 – O6                | 1.66(1)  | 1.69(2) |
| – O7                   | 1.77(2)  | 1.74(2) |
| – O5                   | 1.68(4)  | 1.66(2) |
| – O8                   | 1.77(1)  | 1.77(1) |

|               |         |         |
|---------------|---------|---------|
| $[V2-O]_{av}$ | 1.72    | 1.72    |
| V3 – O9       | 1.78(3) | 1.66(3) |
| – 3 × O10     | 1.64(1) | 1.58(2) |
| $[V3-O]_{av}$ | 1.68    | 1.60    |

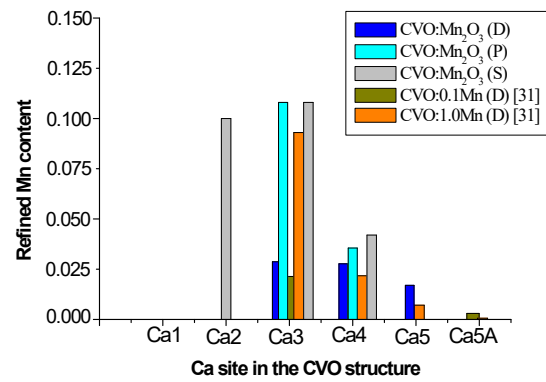

*a*

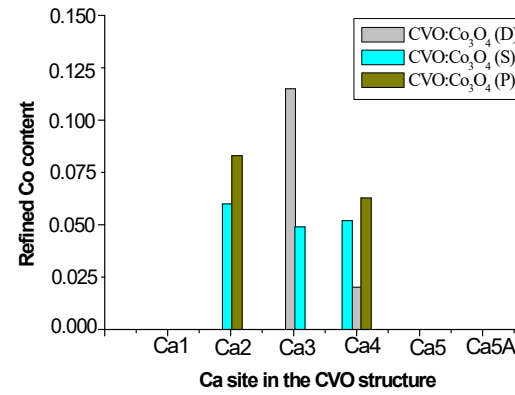

*b*

**Fig. S1.** Refined Mn (*a*) and Co (*b*) content in the Ca crystallographic sites in the Mn- and Co-doped Ca<sub>3</sub>(VO<sub>4</sub>)<sub>2</sub> crystals.

### Additional discussion on the local structure of Mn ions in $\text{Ca}_3(\text{VO}_4)_2$

It should be noted that the formal charge of manganese ions cannot be  $> 4$  since, in this case, a very strong shift towards small values of  $R$ , Å should be observed in Fig. 6c and that towards large values of  $E$ , eV in Figs. 6a,b. It is an additional evidence of the absence of  $\text{Mn}^{5+}$  ions in the structure of  $\text{CVO:Mn}_2\text{O}_3$ . This is in agreement with the general trends of manganese oxides, for which the pre-edge information varies linearly as a function of Mn valence state or symmetry but varies nonlinearly as a function of both parameters [F. Farges, *Physical review B* 71(15) (2005) 155109]. Toriumi et al. [H. Toriumi et al. *Inorganic Chemistry Frontiers* 6(6) (2019) 1587] reported the Mn K-edge EXAFS/XANES data for  $\text{Ba}_3(\text{MnO}_4)_2$  samples with  $\text{Mn}^{5+}$  ions. The spectra differ significantly from those for  $\text{CVO:Mn}_2\text{O}_3$  (Fig. 7). Coordination polyhedron  $\text{MnO}_4^{3-}$  with  $\text{C}_{3v}$  symmetry (trigonal pyramid) in  $\text{Ba}_3(\text{MnO}_4)_2$  has smaller interatomic distances ( $\text{Mn-O1} \times 3 = 1.702 \text{ \AA}$  and  $\text{Mn-O2} \times 1 = 1.664 \text{ \AA}$  [54]) compared to  $\text{VO}_4$  polyhedra (symmetry  $\text{C}_1$  for V1 and V2, symmetry  $\text{C}_{3v}$  for V3) in the  $\text{CVO:Mn}_2\text{O}_3$  structure (see ESI Table S3), which is due to the smaller size of the  $\text{Mn}^{5+}$  ion compared with the  $\text{V}^{5+}$  ions. These are another confirmations of not only even partial presence of  $\text{Mn}^{5+}$  ions in the  $\text{V}^{5+}$  site, but also the absence of  $\text{Mn}^{5+}$  ions in the  $\text{CVO:Mn}_2\text{O}_3$  structure, which is not consistent with the conclusions given in Ref. [I. S. Voronina et al. *Journal of Crystal Growth* 563 (2021) 126104].

Refined actual compositions (see ESI, Table S2), the found distribution of manganese ions over calcium sites (see ESI, Fig. S1), and formal charges of manganese and its local environment in the  $\text{CVO:Mn}$  [G. M. Kuz'micheva et al. *Materials Research Bulletin* 140 (2021) 111300] and  $\text{CVO:Mn}_2\text{O}_3$  indicates different structural behavior of manganese in these structures depending on the method of dopant introduction. This is due to different synthesis processes and conditions. During Czochralski growth, the formation of CVO melt with a small and limited amount of  $\text{Mn}_2\text{O}_3$  introduced over CVO stoichiometry ( $\text{CVO:Mn}$ ) occurs [G. M. Kuz'micheva et al. *Materials Research Bulletin* 140 (2021) 111300]. A solid-phase high-temperature diffusion annealing implies the contact of CVO crystal with  $\text{Mn}_2\text{O}_3$  solid phase ( $\text{CVO:Mn}_2\text{O}_3$ ), which contributes to the introduction of manganese into the CVO structure under the influence of temperature and concentration gradient. It can be assumed, that in the first method, the pre-crystallization melt contains associates of calcium and manganese. Their coordination environment is similar with that of Ca and Mn atoms in the crystal structure, the  $\text{Mn}^{3+}$  ions exhibit their crystal-chemical nature. In the second case, during diffusion high-temperature annealing,  $\text{Mn}_2\text{O}_3$  decomposes to  $\text{Mn}_3\text{O}_4$  and  $\text{O}_2$ . Then the particles are adsorbed on the surface of the CVO crystal, followed by their "capture" by free bonds. As a result, a diffusion of tetrahedral groups with manganese ions (the "radius" of the group is  $\sim 1.3 \text{ \AA}$ ) along the channels (channel size is  $\sim 5.5 \text{ \AA}$ ) in the framework structure (Fig. 3b, 4b) with their final localization in calcium polyhedra with the



retention of the crystallochemical specificity of  $\text{Mn}^{(2+\delta)+}$ , manifested in the  $\text{Mn}_3\text{O}_4$  structure, is occurred. If manganese atoms (ions) rather than groups with oxygen were involved in diffusion process, the structural analysis would have revealed their location in the positions marked by crosses in Fig. 4.
